# Supplementary material
Source: publisher figshare collection journal article supplement (https://rs.figshare.com/ndownloader/files/17811173)
Supplement: Supplementary file [file 17811173]

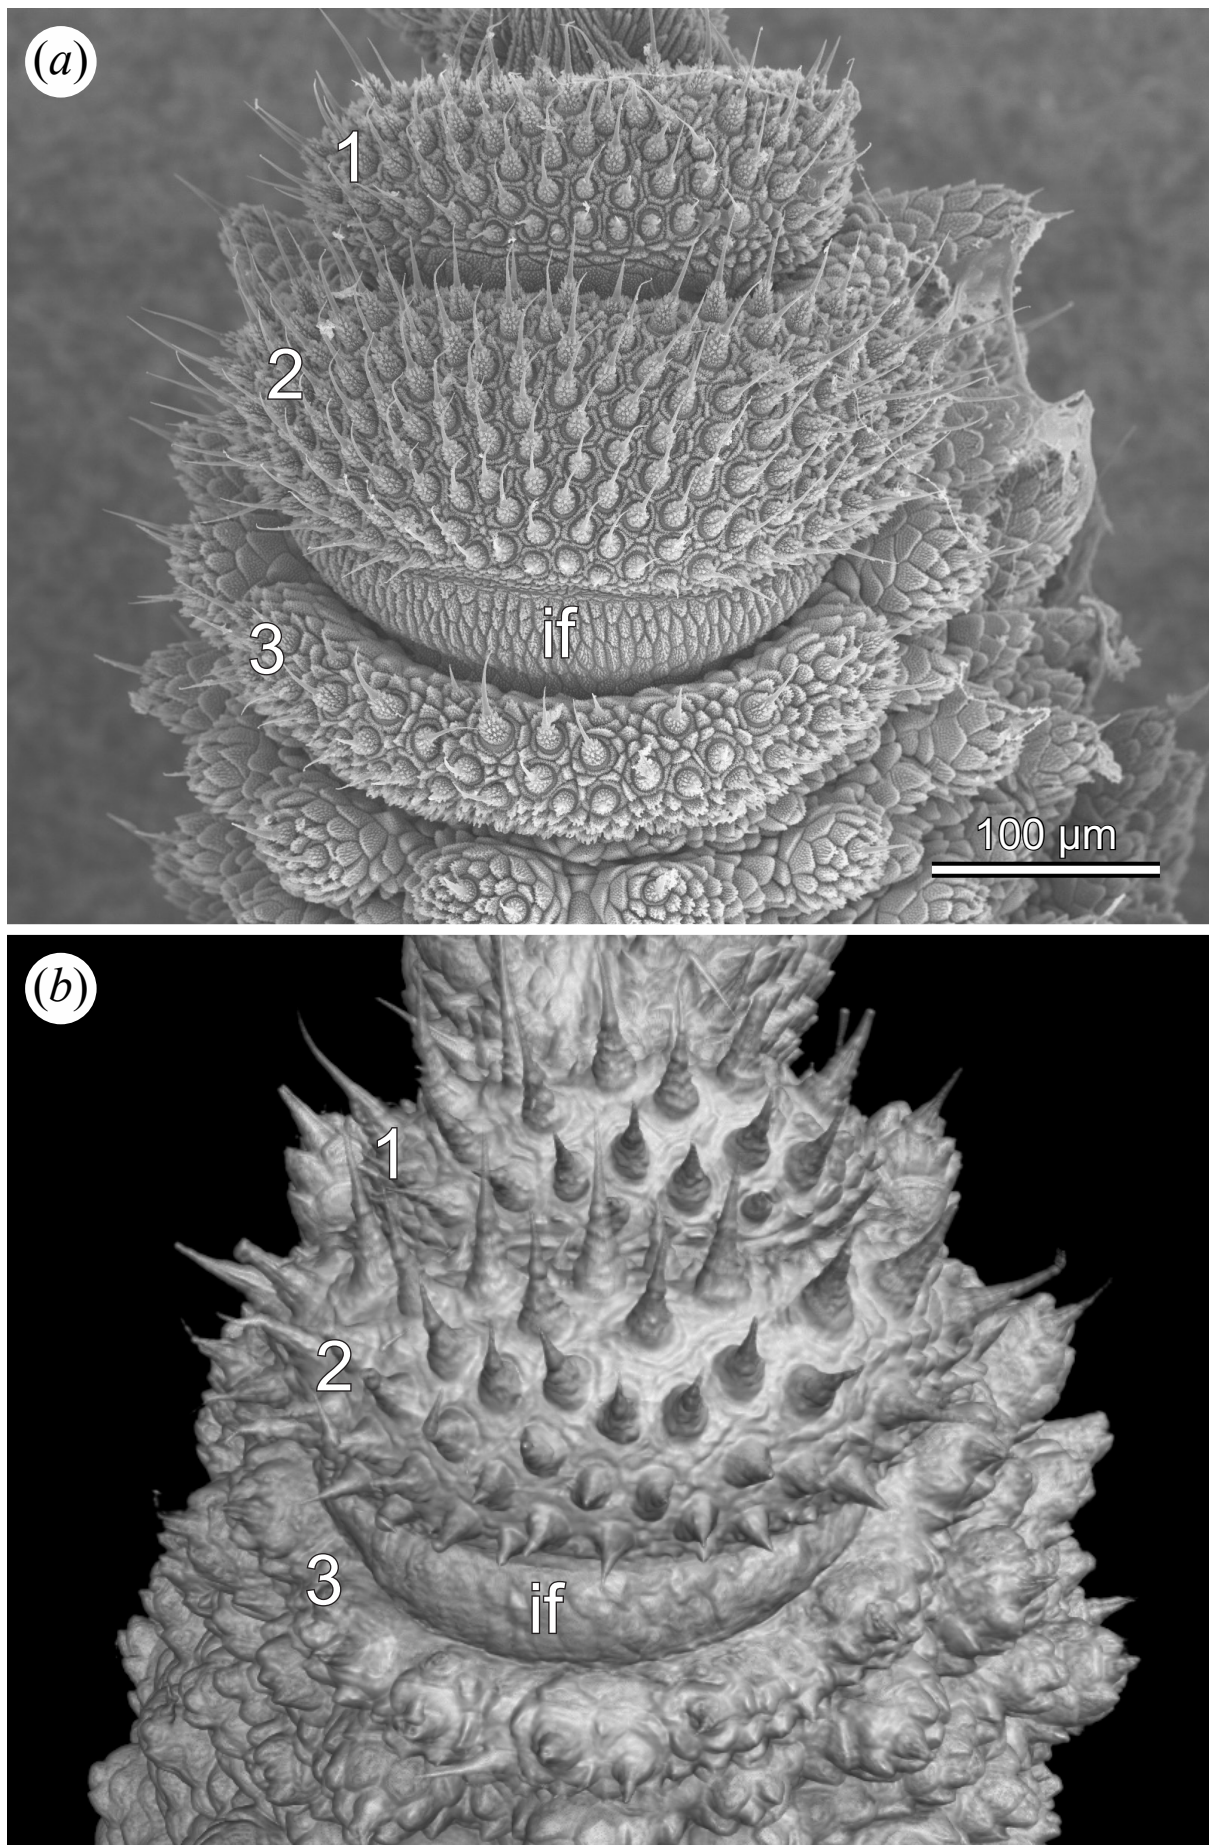

**Supplementary Figure 1. Spinous pads of the lobopod in *E. rowelli*.** Scanning electron micrograph (a) and volume rendering based on nanoCT data (b) from left mid-trunk leg in ventrodistal view. Distal is up in both images. Spinous pads are numbered. Note the position of the spineless integumentary fold between the second and third spinous pads. Abbreviation: if, spineless integumentary fold.
